# Supplementary material for: Cr(iii) adsorption by fluorinated activated boron nitride: a combined experimental and theoretical investigation
Source: Royal Society of Chemistry journal article supplement (doi:10.1039/c4ra01684j), 2014-01-01
Supplement: c4ra01684j1.pdf [file c4ra01684j1.pdf]

Electronic supplementary information

## Cr(III) adsorption by fluorinated activated boron nitride: a combined experimental and theoretical investigation

Jie Li, Peng Jin\* and Chengchun Tang\*

*School of Materials Science and Engineering, Hebei University of Technology, Tianjin 300130, People's Republic of China.*

*Fax: +86-22-60202660; Tel: +86-22-60202660;*

*E-mail: china.peng.jin@gmail.com. (P. J.) ; tangcc@hebut.edu.cn (C. T.)*

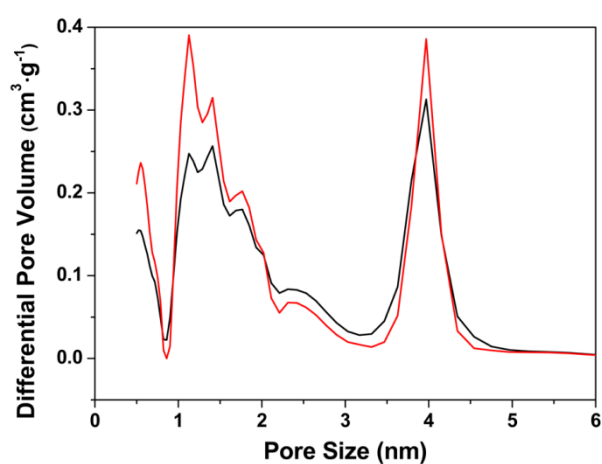

**Fig. S1** Pore size distributions of ABN (black) and F-ABN (red).

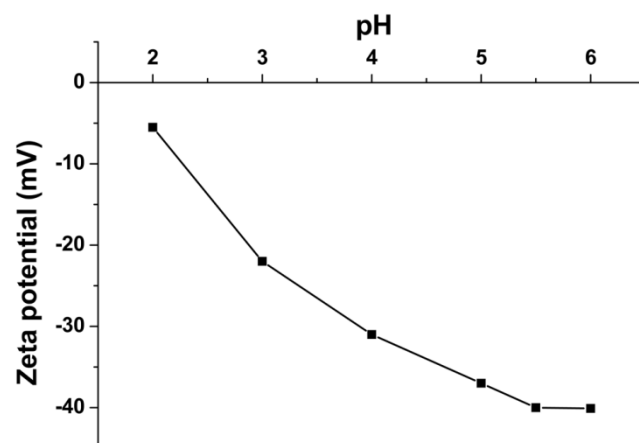

**Fig. S2** Zeta potential vs. pH value of F-ABN.

## Kinetic model

The pseudo-first-order and pseudo-second-order models are displayed in Eqs. S1 and S2, respectively:

$$\ln(q_e - q_t) = \ln q_e - k_1 t \quad (\text{S1})$$

$$t/q_t = 1/k_2 q_e^2 + t/q_e \quad (\text{S2})$$

where  $q_e$  and  $q_t$  (mg/g) are the amounts of Cr(III) adsorbed at equilibrium and time  $t$ , respectively;  $k_1$  ( $\text{min}^{-1}$ ) and  $k_2$  ( $\text{g mg}^{-1} \text{min}^{-1}$ ) are the rate constants of the pseudo-first-order and pseudo-second-order adsorptions, respectively.

**Table S1** Comparison between the adsorption kinetic data of the pseudo-first-order and pseudo-second-order models.

| adsorbent | pseudo-first-order          |                              |       | pseudo-second-order              |                              |       |
|-----------|-----------------------------|------------------------------|-------|----------------------------------|------------------------------|-------|
|           | $k_1$ ( $\text{min}^{-1}$ ) | $q_e$ ( $\text{mg g}^{-1}$ ) | $R^2$ | $k_2$ ( $\text{g mg min}^{-1}$ ) | $q_e$ ( $\text{mg g}^{-1}$ ) | $R^2$ |
| F-ABN     | $1.125 \times 10^{-5}$      | 153                          | 0.721 | $1.61 \times 10^{-5}$            | 207.79                       | 0.992 |

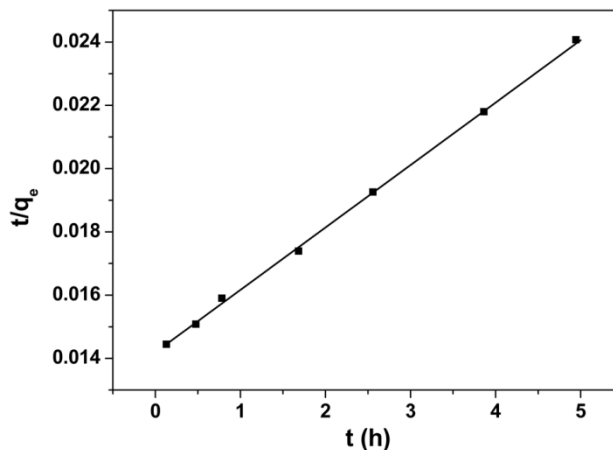

**Fig. S3** The fitting of Cr(III) adsorption by F-ABN using the pseudo-second-order kinetic model (initial concentration of Cr(III): 52 mg/L; pH: 5.5; adsorbent: 50 mg; T: 30 °C).

### Thermodynamic model

Using the values of Langmuir constant  $b$  (3.45) and Eqs. S3 - S5, one can calculate the variations of apparent enthalpy ( $\Delta H$ ), apparent free energy ( $\Delta G$ ), and apparent entropy ( $\Delta S$ ) of chromium sorption on F-ABN:

$$\ln b = - (\Delta H/RT) + \text{constant} \quad (\text{S3})$$

$$\Delta G = - RT \ln b \quad (\text{S4})$$

$$\Delta S = (\Delta H - \Delta G)/T \quad (\text{S5})$$

where  $R$  is the gas law constant and  $T$  is the absolute temperature.

**Table S2** The apparent thermodynamic parameters of Cr(III) adsorption on F-ABN.

| T (K) | $\Delta G$ (kJ/mol) | $\Delta H$ (kJ/mol) | $\Delta S$ (J/mol K) |
|-------|---------------------|---------------------|----------------------|
| 283   | -0.71               | -0.68               | 0.106                |
| 293   | -2.51               | -2.49               | 0.068                |
| 303   | -3.16               | -3.15               | 0.033                |

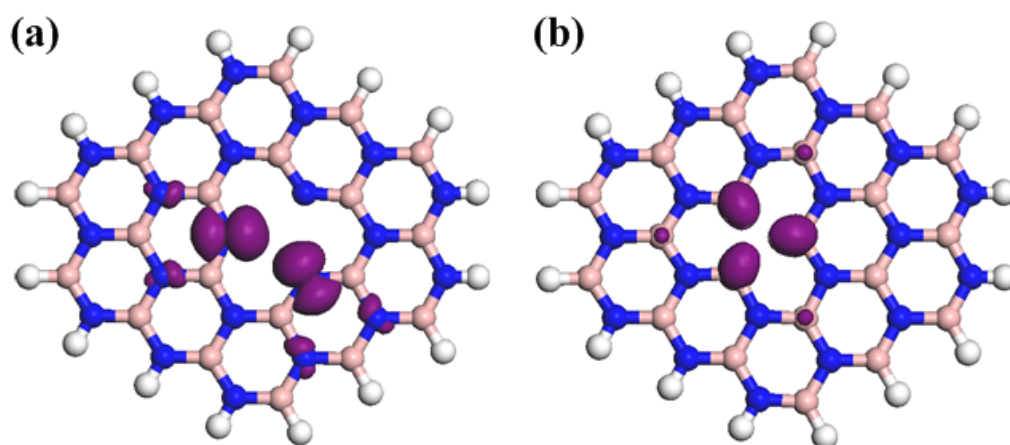

**Fig. S4** Spin density distributions of the (a)  $\text{BNF}_{\text{BV}}$  and (b)  $\text{BNF}_{\text{NV}}$ .
